## Correction for: Ganglioside GD1a enhances osteogenesis by activating ERK1/2 in mesenchymal stem cells of *Lmna* mutant mice

Dong Hoon Kwak<sup>1,2</sup>, Ji Hye Park<sup>1,2</sup>, Eul Sig Choi<sup>1,2</sup>, Seong Hyun Park<sup>1,2</sup>, Seo-Yeon Lee<sup>1,2</sup>, Seoul Lee<sup>1,2</sup>

<sup>1</sup>Department of Pharmacology, School of Medicine, Wonkwang University, Iksan, Jeollabuk-do 54538, Republic of Korea

<sup>2</sup>Brain Research Institute, Wonkwang University, Iksan, Jeollabuk-do 54538, Republic of Korea

**Correspondence to:** Seoul Lee; email: [stress@wku.ac.kr](mailto:stress@wku.ac.kr)

**Keywords:** *Lmna*, mesenchymal stem cells, osteogenesis, GD1a, aging

**Original article:** *Aging (Albany NY)* 2022; 14: pp 9445-9457

PMID: [36375476](https://pubmed.ncbi.nlm.nih.gov/36375476/)

PMCID: [PMC9792213](https://pubmed.ncbi.nlm.nih.gov/PMC9792213/)

doi: [10.18632/aging.204378](https://doi.org/10.18632/aging.204378)

**This article has been corrected:** The authors found that Western blot images of p-ERK1/2 and ERK1/2 in **Figure 4F** were from different experiment with protein extracts from *Lmna*<sup>Dhe/+</sup> mice. They replaced the incorrect images with the images of p-ERK1/2 and ERK1/2 in MSC protein extracts from normal and Lamin A/C knockdown (KD) mice. In **Figure 4H**, the authors corrected a typo where “p-ERK1/2” was mislabeled “p-REK1/2”. The authors also revised the Figure legend for **Figure 4F** and **4G** as follows: “(F) Lamin A/C was knocked down in mouse MSCs using siRNA. (G) Primary MSCs with *Lmna*<sup>Dhe/+</sup> mutation were isolated from *Lmna*<sup>Dhe/+</sup> mice.” These corrections have no impact on the experimental outcome or conclusions.

Corrected **Figure 4** legend and panels **4F** and **4G** presented below.

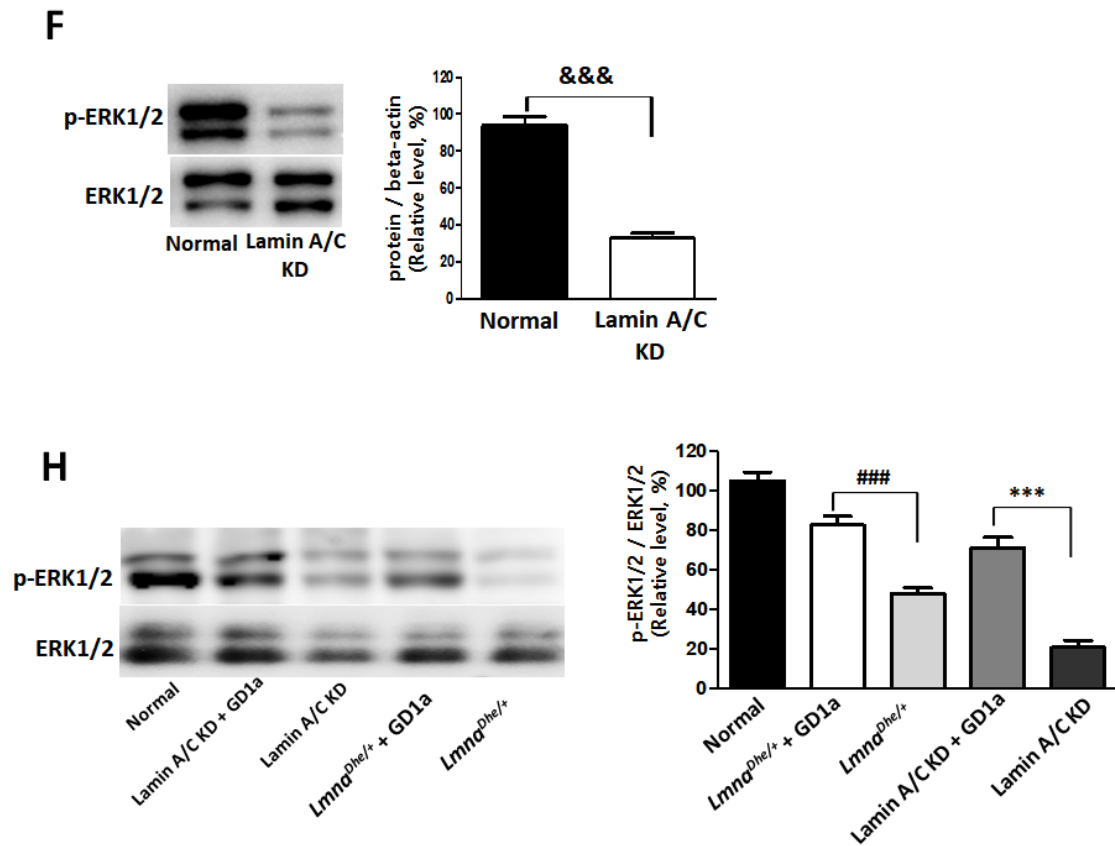

**Figure 4. Increases of osteogenesis and ERK1/2 activation in GD1a-treated *Lmna* dysfunction MSCs.** ... dysfunction MSCs. (F) Lamin A/C was knocked down in mouse MSCs using siRNA. (G) Primary MSCs with *Lmna*<sup>Dhe/+</sup> mutation were isolated from *Lmna*<sup>Dhe/+</sup> mice. (H) Phosphorylation of ERK1/2 in *Lmna* dysfunction MSCs treated with GD1a. (I).... Phosphorylation of ERK1/2 was determined by western blotting with anti-p-ERK1/2. ERK1/2 was used as a loading control. Values represent mean  $\pm$  SD; &&& $p < 0.001$  indicates a significant difference from the normal MSCs; \*\*\* $p < 0.001$  indicates a significant difference from the *Lmna*<sup>Dhe/+</sup> mutant MSCs; ### $p < 0.001$  indicates a significant difference from the Lamin A/C KD MSCs. \$\$\$ $p < 0.001$  indicates a significant difference from the U0126-treated MSCs.
